# Supplementary material for: Supporting critical raw material circularity – upcycling graphite from waste LIBs to Zn–air batteries
Source: Royal Society of Chemistry journal article supplement (doi:10.1039/d3gc04315k), 2024-01-01
Supplement: d3gc04315k1.pdf [file d3gc04315k1.pdf]

## Supporting Critical Raw Material Circularity – Upcycling Graphite from Waste LIBs to Zn-air Batteries

*Reio Praats<sup>a</sup>, Alexander Chernyaev<sup>b</sup>, Jani Sainio<sup>c</sup>, Mari Lundström<sup>b</sup>, Ivar Kruusenberg<sup>a</sup> and Kerli Liivand<sup>a\*</sup>*

<sup>a</sup>R. Praats, I. Kruusenberg, K. Liivand

National Institute of Chemical Physics and Biophysics, Akadeemia tee 23, 12618, Tallinn, Estonia, \*E-mail: kerli.liivand@kbfi.ee

<sup>b</sup>A. Chernyaev, M. Lundström

Department of Chemical and Metallurgical Engineering, School of Chemical Engineering, Aalto University, P.O. Box 16200, 00076 Aalto, Finland

<sup>c</sup>J. Sainio

Department of Applied Physics, School of Science, Aalto University, P.O. Box 15100, 00076 Aalto, Finland

## Figures

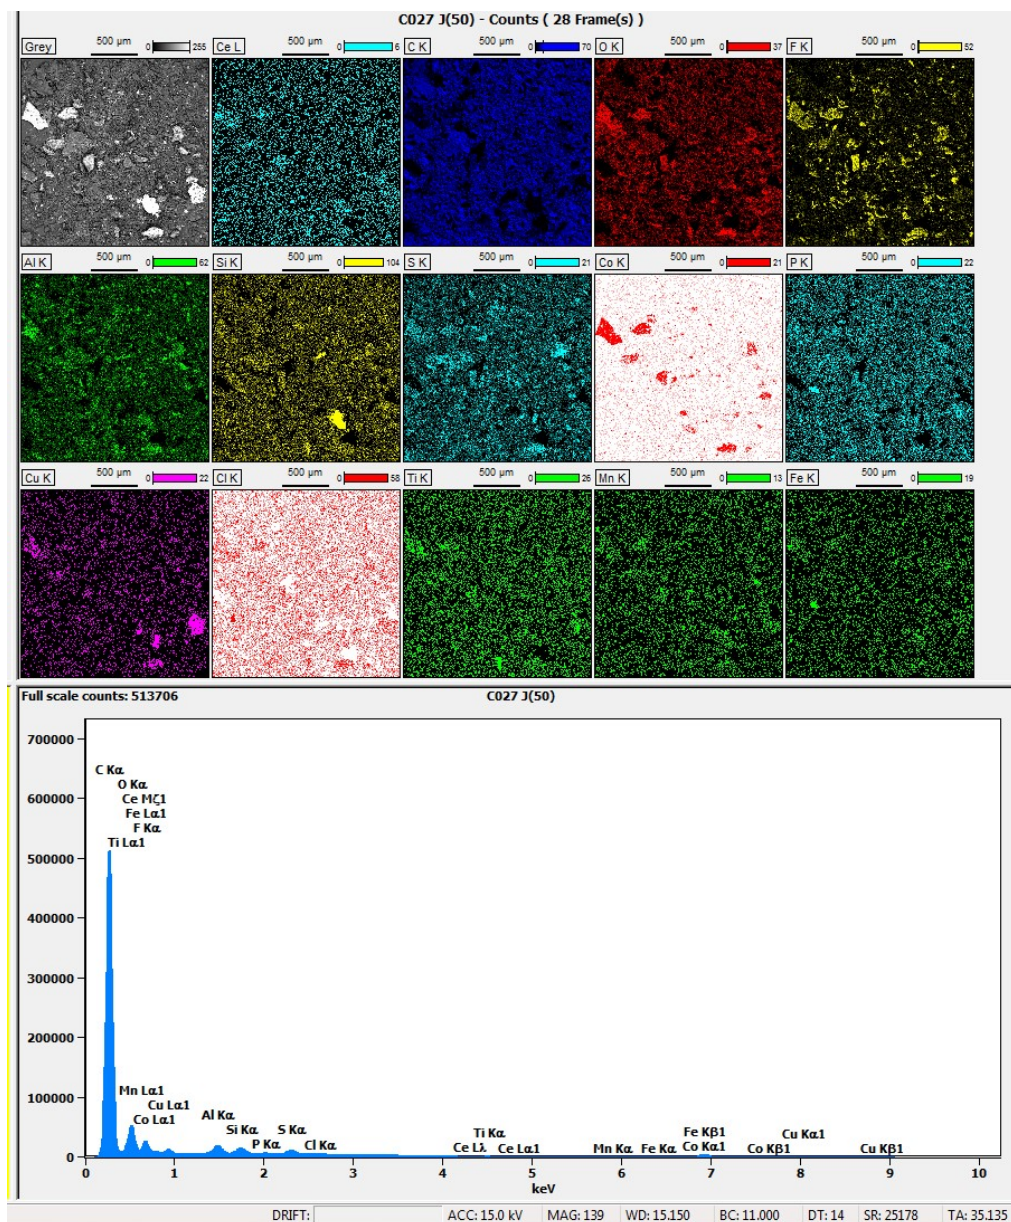

Figure S1. SEM-EDX mapping of Raw material, wt% of elemental composition shown in Table 1 (in manuscript file).

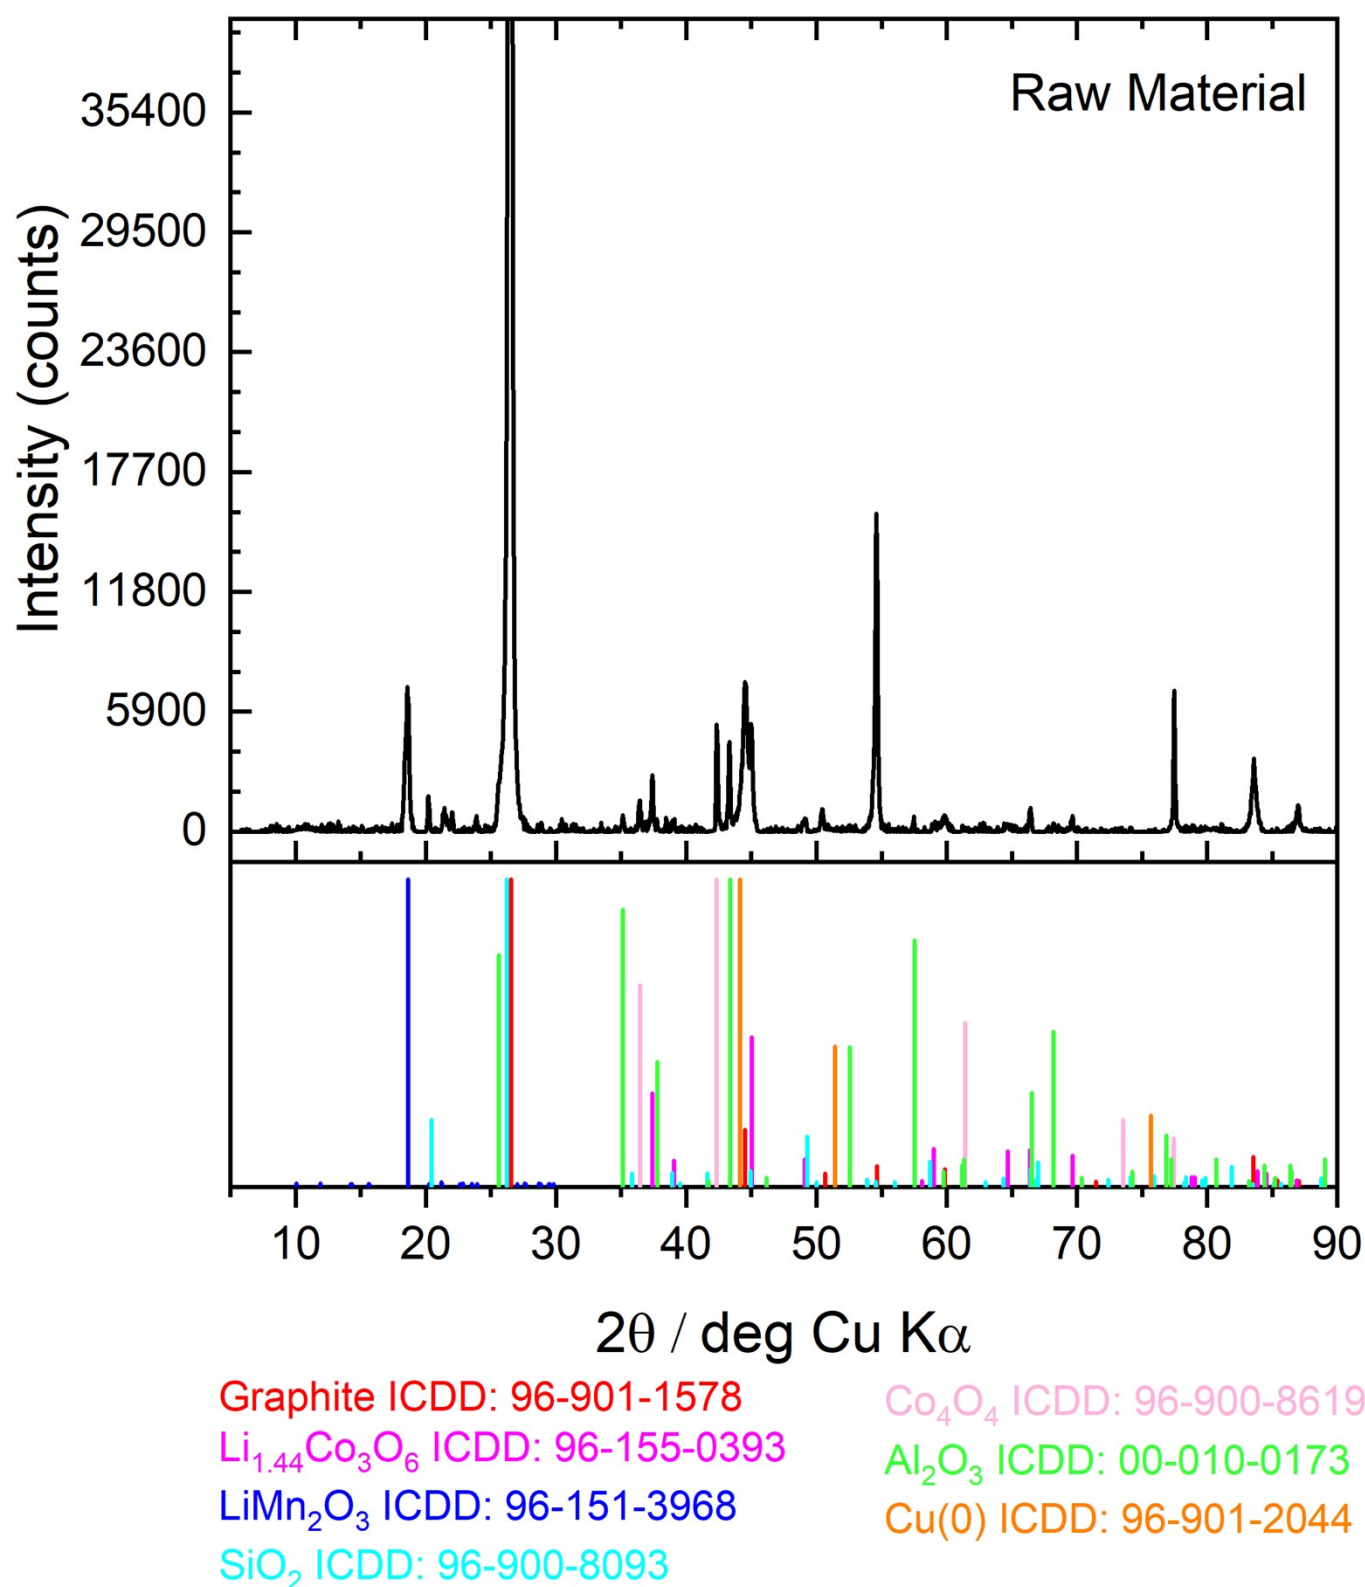

Figure S2. XRD diffractogram of Raw material.

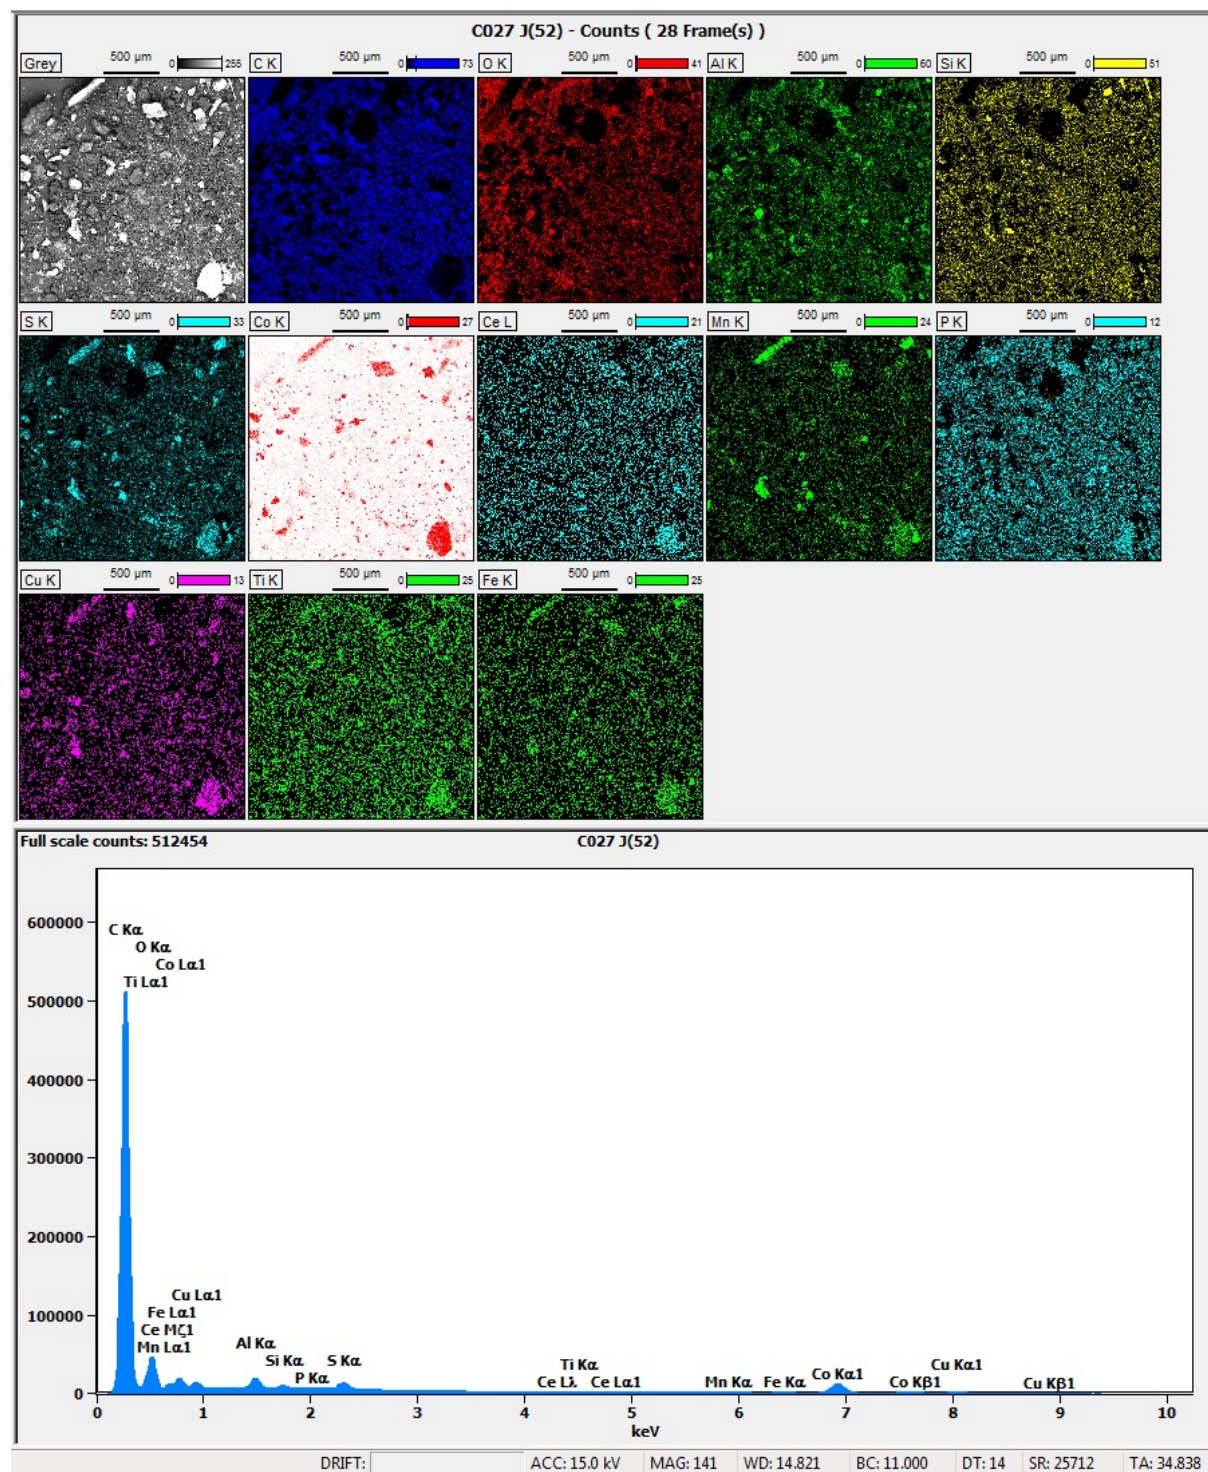Figure S3. SEM-EDX mapping of *HT-Bat-res.*

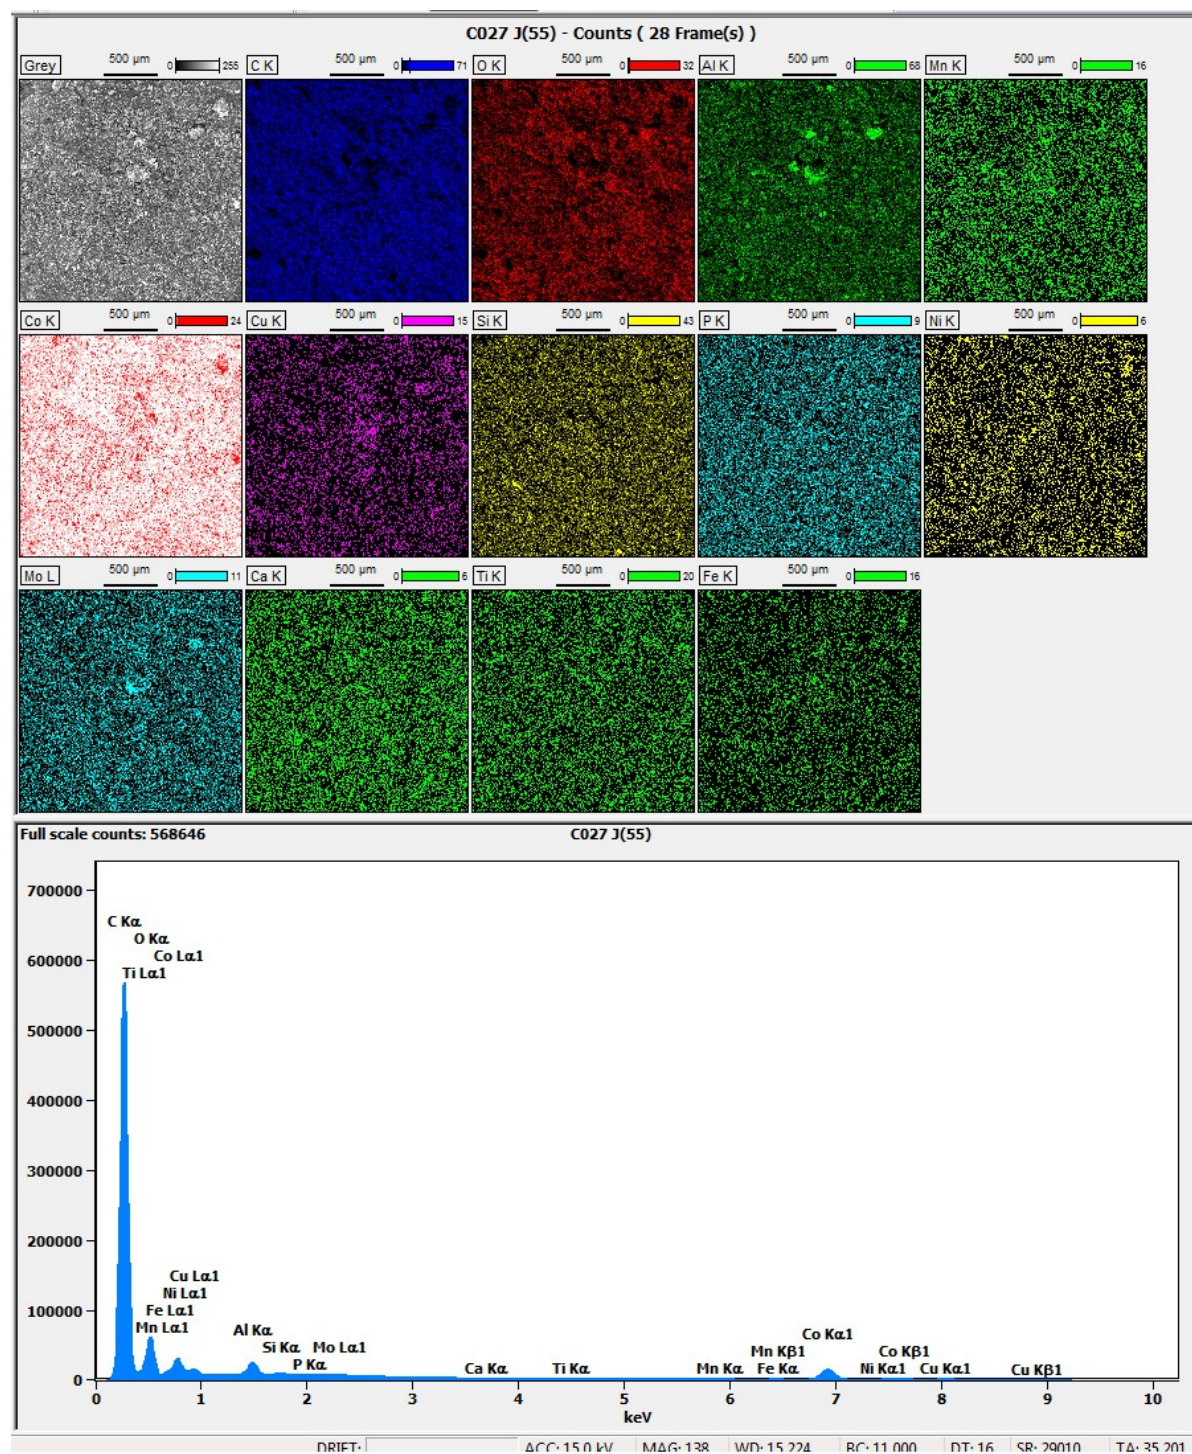Figure S4. SEM-EDX mapping of *Bat-res-N*.

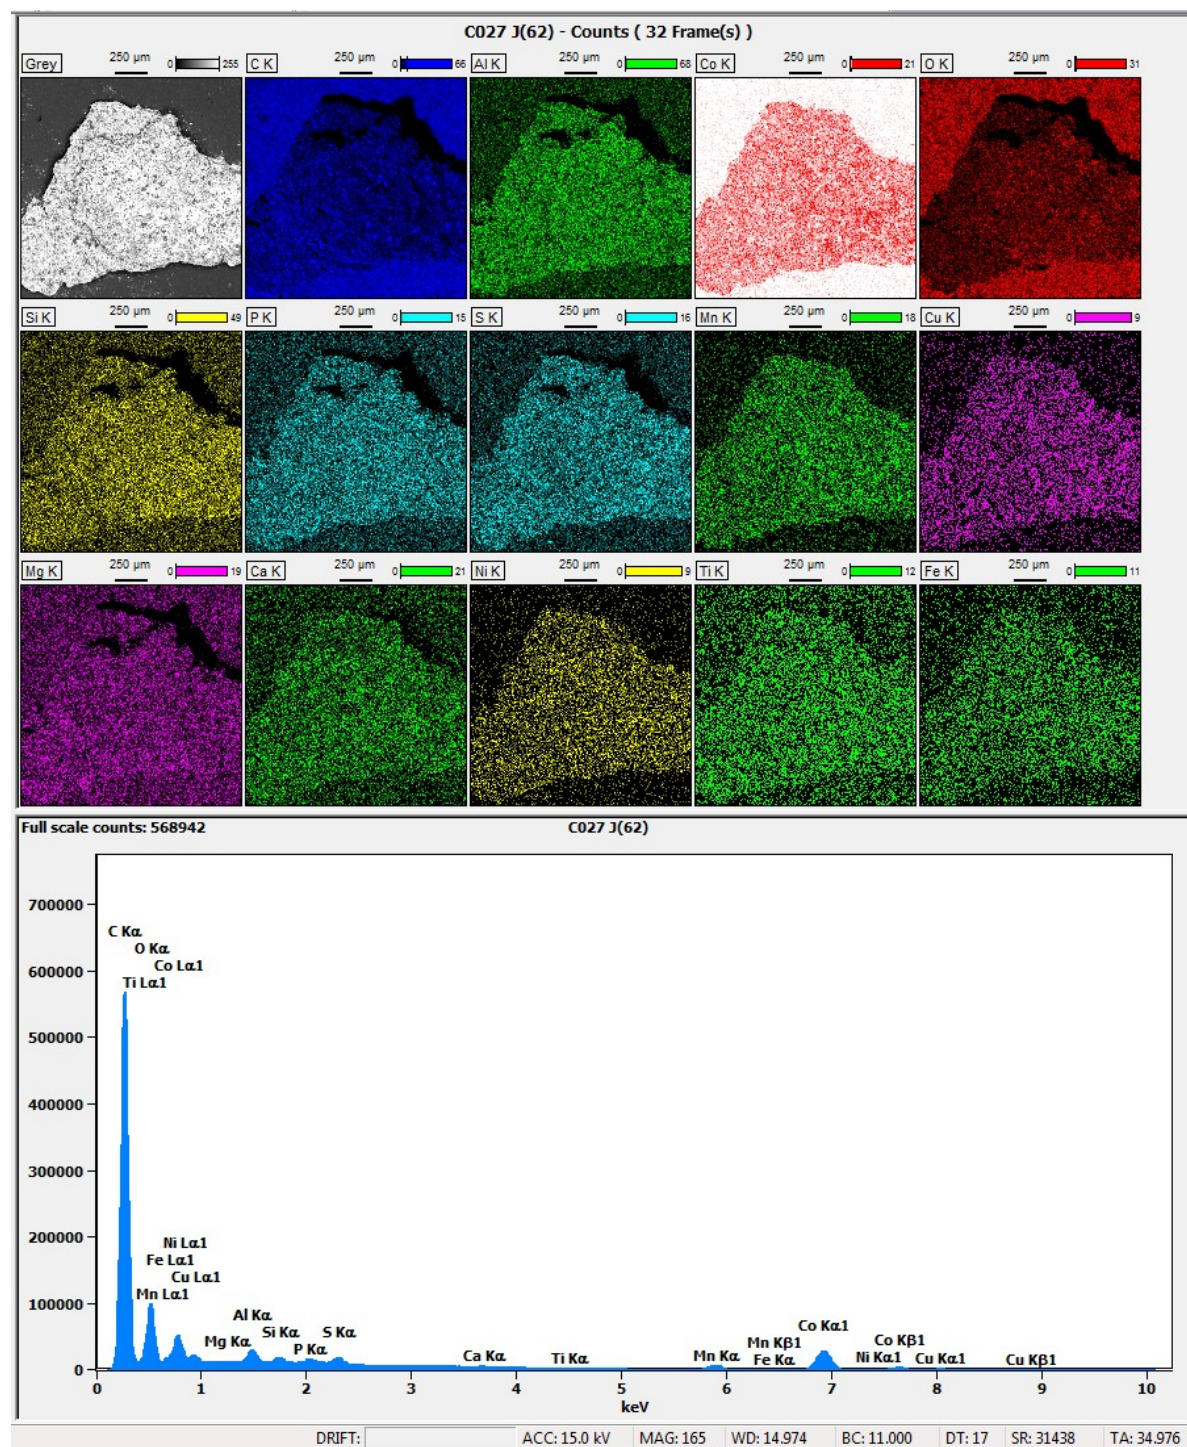Figure S5. SEM-EDX mapping of *HT-Bat-res-BM-N*.

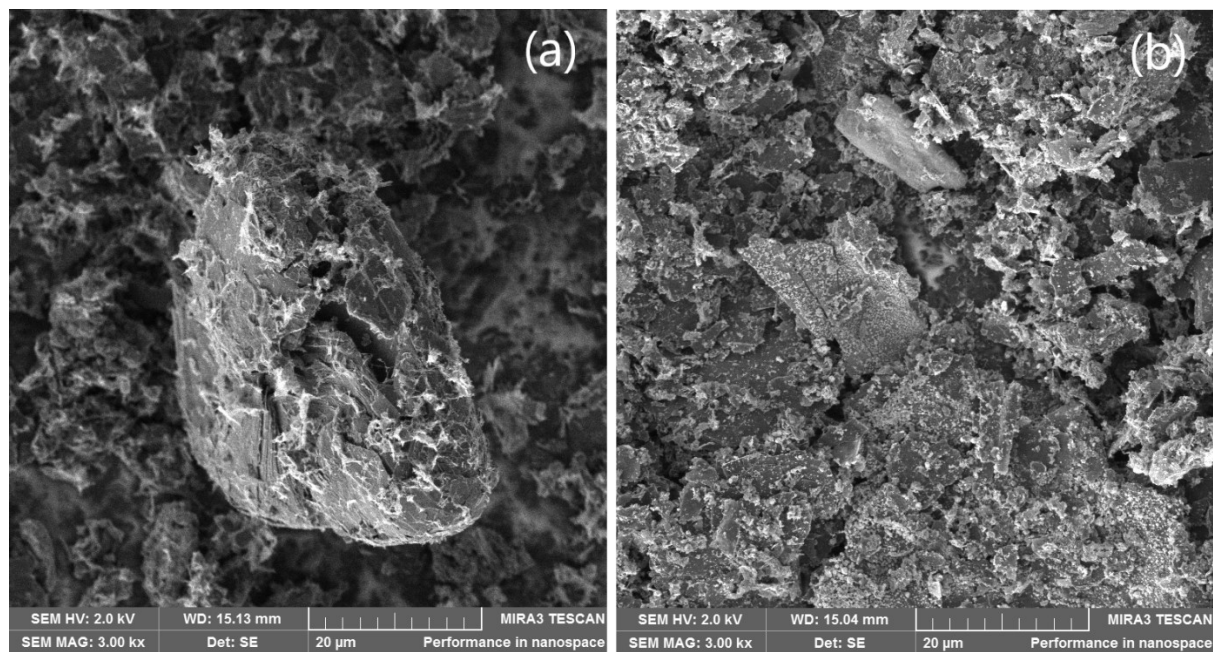

Figure S6. SEM micrographs of (a) *Bat-res-N* and (b) *HT-Bat-res-BM-N* catalyst materials using 3000x magnification.

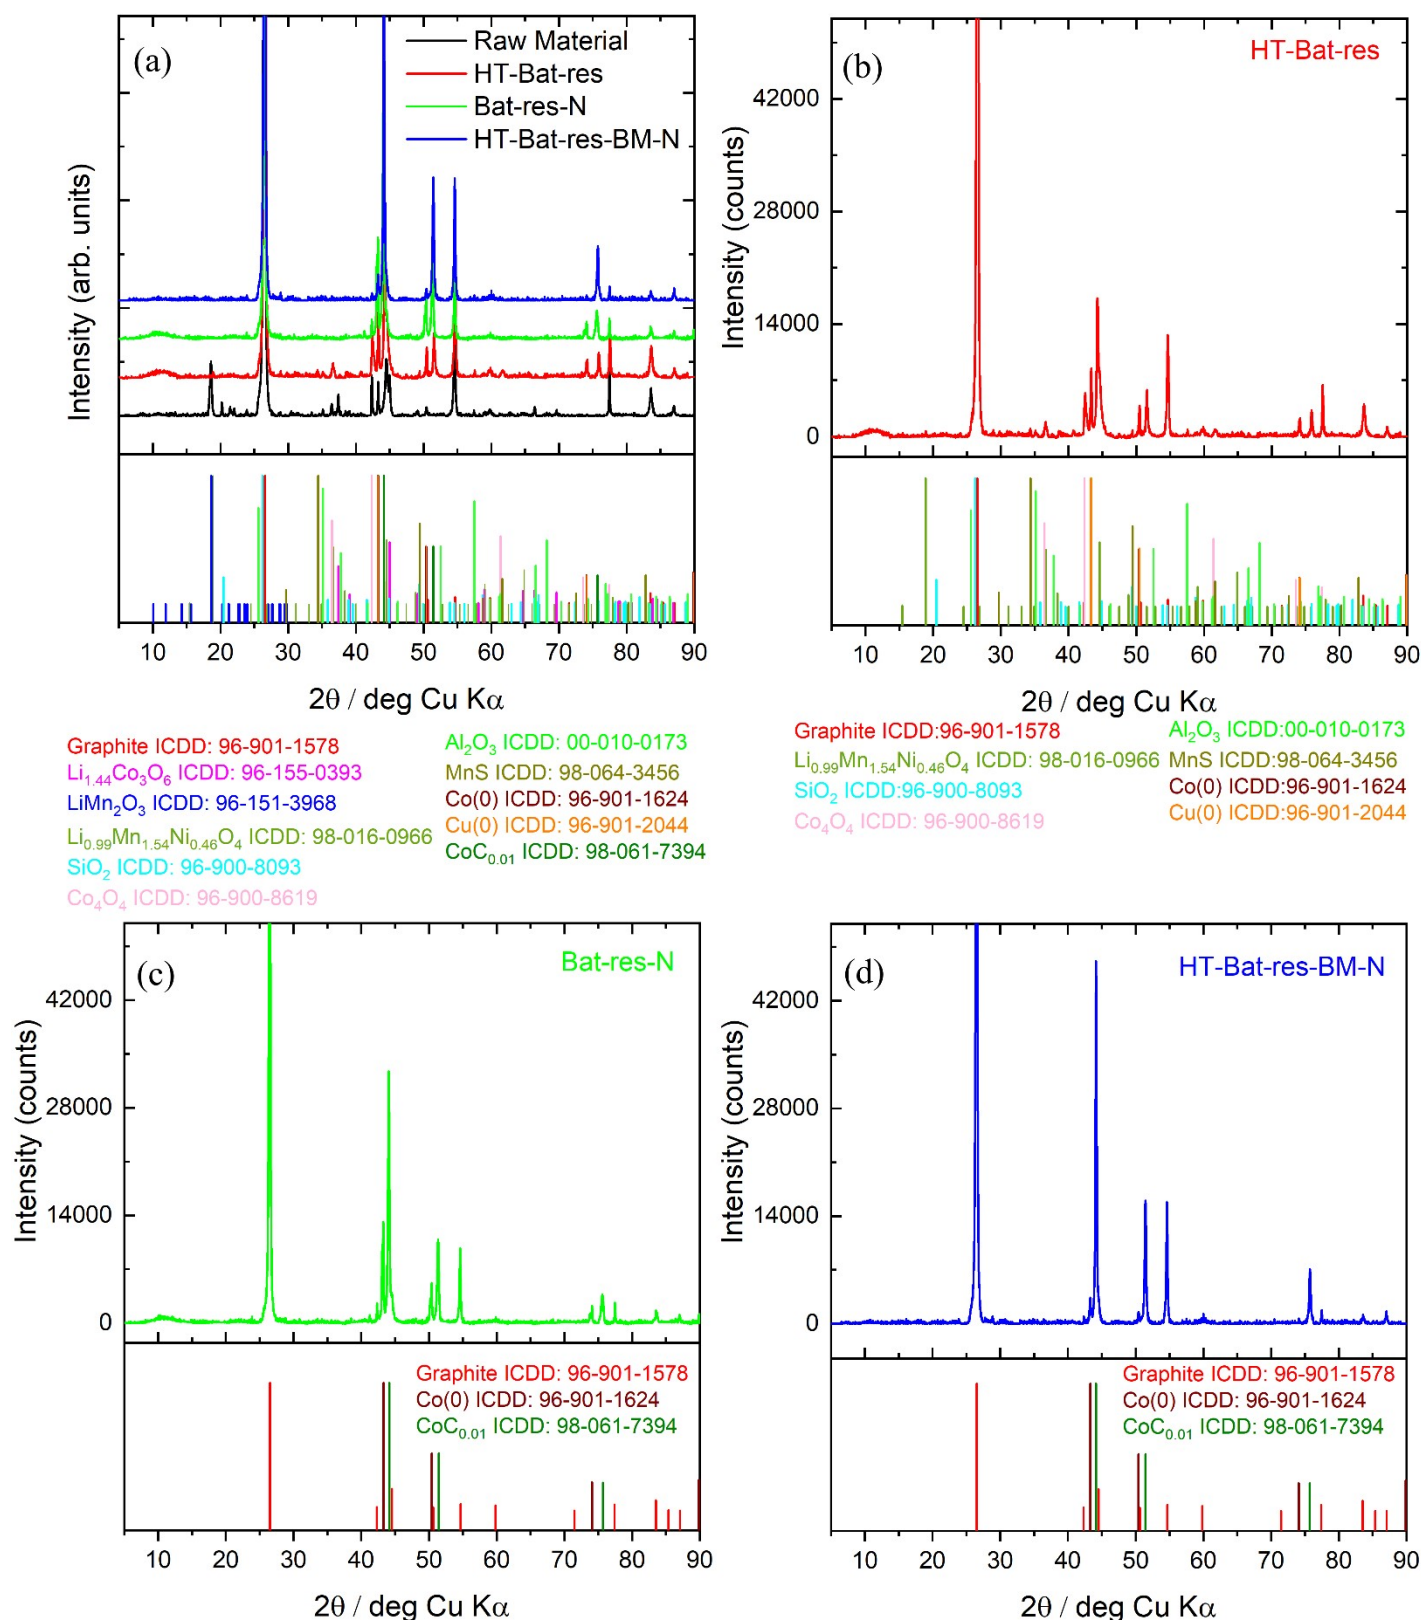

Figure S7. XRD diffractograms of (a) Raw material, HT-Bat-res, Bat-res-N, HT-Bat-res-BM-N catalyst materials, (b) HT-Bat-res, (c) Bat-res-N and (d) HT-Bat-res-BM-N with standard cards.



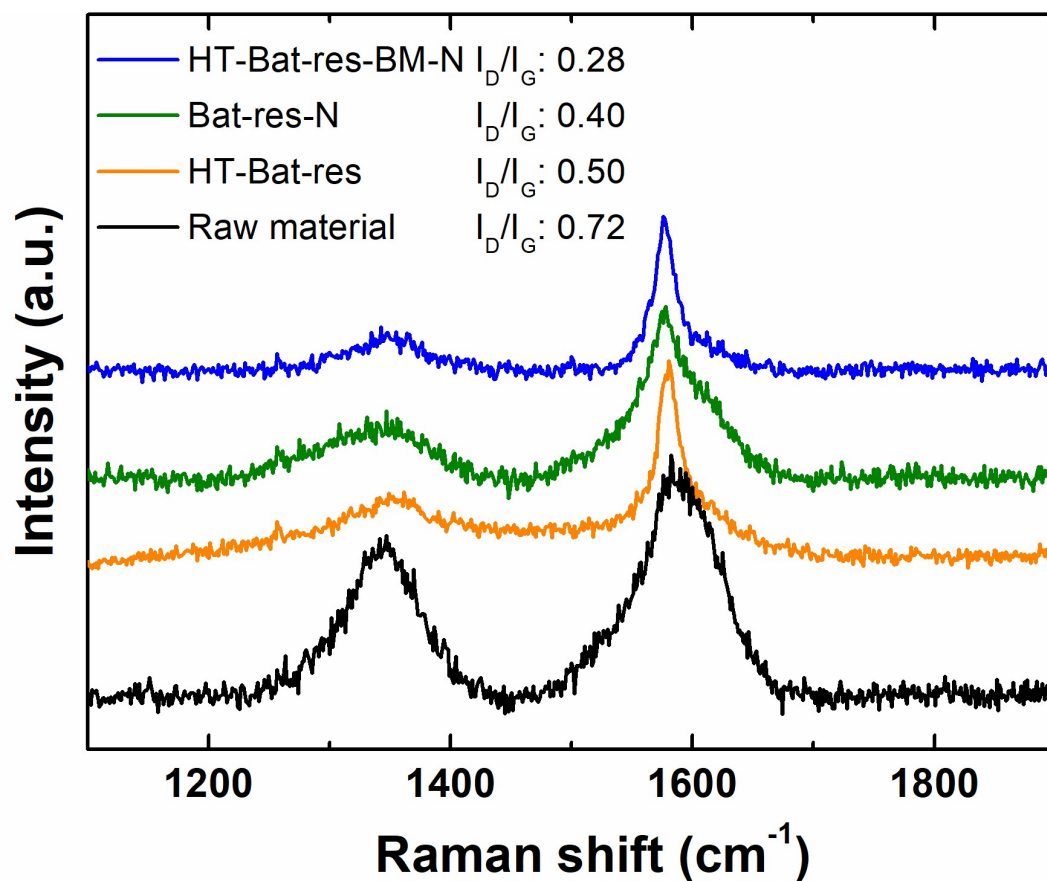

Figure S8. Raman spectra of Raw material, *HT-Bat-res*, *Bat-res-N*, *HT-Bat-res-BM-N* catalyst materials.

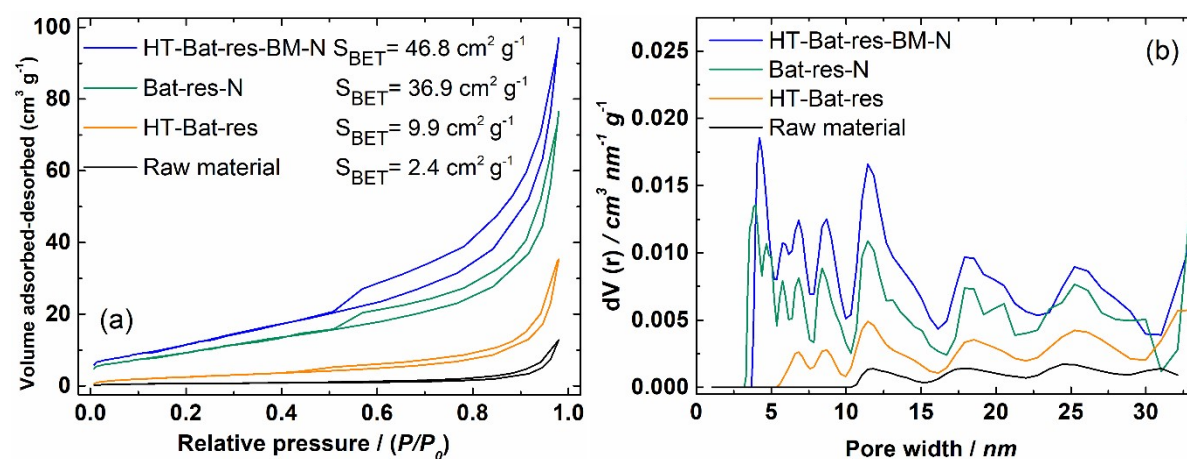

Figure S9. (a)  $N_2$  adsorption-desorption isotherms and (b) pore size distribution of Raw material, *HT-Bat-res*, *Bat-res-N*, *HT-Bat-res-BM-N* materials.

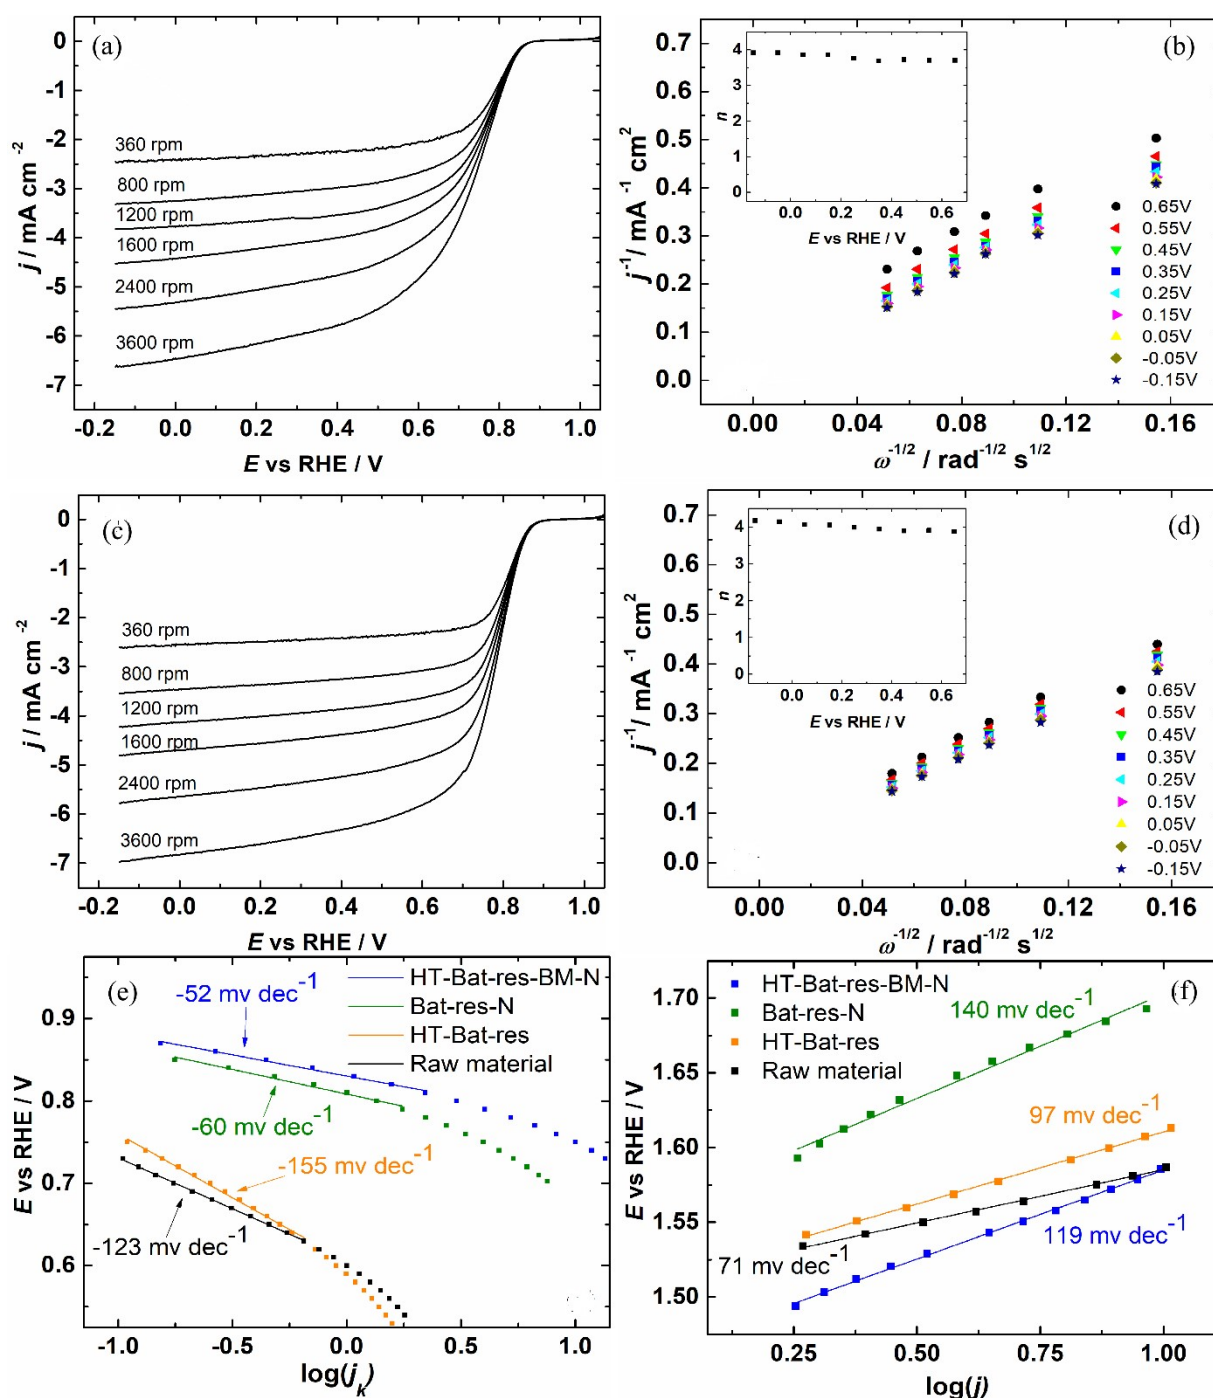

Figure S10. ORR polarization curves on different rotating speeds for (a) *Bat-res-N* and (c) *HT-Bat-res-BM-N* and Koutecky-Levich plots derived from ORR data from the RDE data (b) *Bat-res-N* and (d) *HT-Bat-res-BM-N* for studied materials. The insets of Fig b and d show the dependence of  $n$  vs potential. (e) ORR Tafel plots and (f) OER Tafel plots for Raw material, *HT-Bat-res*, *Bat-res-N* and *HT-Bat-res-BM-N*.

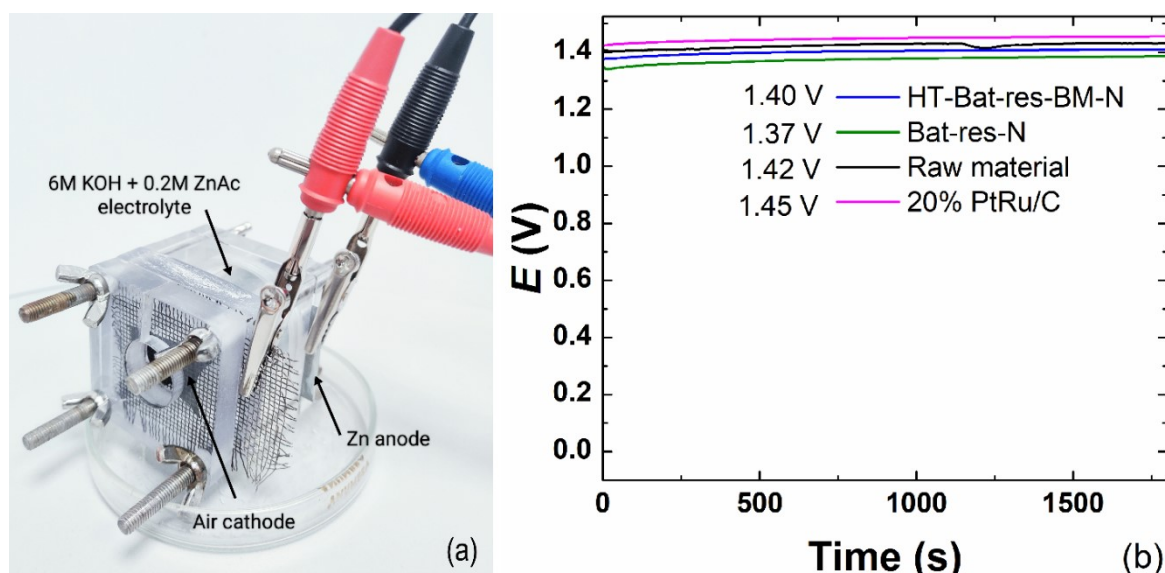

Figure S11. a) Zn-Air battery assembly and b) open circuit potential of different ZABs

## Tables

Table S1. The atomic percentages (at-%) of the elements for *Bat-res-N* and *HT-Bat-res-BM-N* samples including peak fitting results from XPS data (data acquired from Fig. 2). The error associated with each value is roughly  $\pm 10\%$  of the value.

| Element                                 | Bat-res-N   | HT-Bat-res-BM-N |
|-----------------------------------------|-------------|-----------------|
| <b>C</b>                                | <b>77.1</b> | <b>74.2</b>     |
| of which                                |             |                 |
| sp <sup>2</sup> C                       | 57 %        | 55 %            |
| sp <sup>3</sup> C / sp <sup>2</sup> C-N | 21 %        | 24 %            |
| C-O/ sp <sup>3</sup> C-N                | 9 %         | 10 %            |
| C=O                                     | 4 %         | 4 %             |
| O-C=O                                   | 3 %         | 2 %             |
| $\pi$ - $\pi^*$                         | 6 %         | 5 %             |
| <b>O</b>                                | <b>12.4</b> | <b>13.9</b>     |
| <b>N</b>                                | <b>5.6</b>  | <b>6.4</b>      |
| of which                                |             |                 |
| Pyridinic-N                             | 50 %        | 55 %            |
| Pyrrolic-N                              | 29 %        | 24 %            |
| Graphitic-N                             | 11 %        | 11 %            |
| N-oxide                                 | 10 %        | 9 %             |
| <b>Al</b>                               | <b>2.1</b>  | <b>2.1</b>      |
| <b>Mn</b>                               | <b>0.5</b>  | <b>0.9</b>      |
| <b>Li</b>                               | <b>1.4</b>  | <b>0.6</b>      |
| <b>Co</b>                               | <b>0.1</b>  | <b>0.4</b>      |
| of which                                |             |                 |
| Co(0)                                   | 6 %         | 8 %             |
| CoO / Co-N                              | 94 %        | 92 %            |
| <b>Zr</b>                               | -           | <b>0.2</b>      |
| <b>Cu</b>                               | <b>0.3</b>  | <b>0.2</b>      |
| <b>Ni</b>                               | <b>0.1</b>  | <b>0.1</b>      |
| <b>F</b>                                | <b>0.3</b>  | <b>0.9</b>      |
| <b>S</b>                                | <b>0.1</b>  | <b>0.1</b>      |

Table S2. Comparison of catalysts ZAB performance.

| Catalyst                                      | Mass loading (mg cm <sup>-2</sup> ) | OCV (V) | Peak power density (mW cm <sup>-2</sup> ) | <i>j</i> of peak power density (mA cm <sup>-2</sup> ) | Stability (h) | Stability conditions                           | Ref           |
|-----------------------------------------------|-------------------------------------|---------|-------------------------------------------|-------------------------------------------------------|---------------|------------------------------------------------|---------------|
| <i>Bat-res-N</i>                              | 1.0                                 | 1.37    | 97                                        | 150                                                   | -             | -                                              | This article  |
| <i>HT-Bat-res-N</i>                           | 1.0                                 | 1.40    | 104                                       | 160                                                   | 80            | 30 min charge-discharge 10 mA cm <sup>-2</sup> | This article  |
| 20% PtRu/C                                    | 1.0                                 | 1.45    | 95                                        | 158                                                   | 15            | 30 min charge-discharge 10 mA cm <sup>-2</sup> | This article  |
| Co@CoFe <sub>0.01</sub> -N-C                  | 1.0                                 | 1.56    | 174                                       | 235                                                   | 100           | 10 min charge-discharge 1 mA cm <sup>-2</sup>  | <sup>1</sup>  |
| FeNi/N-GPCM                                   | N/I                                 | 1.47    | 321                                       | 450                                                   | 400           | 10 min charge-discharge 10 mA cm <sup>-2</sup> | <sup>2</sup>  |
| Mn <sub>0.9</sub> Fe <sub>2.1</sub> C/N-C     | 2.0                                 | 1.50    | 160                                       | 250                                                   | 334           | 20 min charge-discharge 5 mA cm <sup>-2</sup>  | <sup>3</sup>  |
| Pd <sub>3</sub> Cu <sub>1</sub> /N-rGO        | -                                   | 1.46    | 164                                       | 230                                                   | -             | -                                              | <sup>4</sup>  |
| NiCo <sub>2</sub> O <sub>4</sub> /NCN-Ts/NiCo | ~6                                  | 1.51    | 91                                        | 175                                                   | 586           | 60 min charge-discharge 2 mA cm <sup>-2</sup>  | <sup>5</sup>  |
| FeCo@PCNF                                     | 2.0                                 | 1.48    | 290                                       | 460                                                   | N/I           | N/I                                            | <sup>6</sup>  |
| Cu/Fe-NG                                      | 1.0                                 | 1.53    | 164                                       | 270                                                   | 18            | 20 min charge-discharge 10 mA cm <sup>-2</sup> | <sup>7</sup>  |
| Fe-Cu-N4/C                                    | 2.0                                 | 1.45    | 85                                        | 150                                                   | 250 cycles    | N/I                                            | <sup>8</sup>  |
| NCNT/MnO-(MnFe) <sub>2</sub> O <sub>3</sub>   | 2.0                                 | 1.45    | 98                                        | 160                                                   | 20            | 5 min charge-discharge 20 mA cm <sup>-2</sup>  | <sup>9</sup>  |
| NCNT/CoFe-CoFe <sub>2</sub> O <sub>4</sub>    | 2.0                                 | 1.56    | 98                                        | 160                                                   | 20            | 5 min charge-discharge 20 mA cm <sup>-2</sup>  | <sup>9</sup>  |
| FeCu <sub>0.3</sub> -N/C                      | 1.0                                 | 1.50    | 111                                       | 200                                                   | 75            | N/I min charge-discharge 5 mA cm <sup>-2</sup> | <sup>10</sup> |
| Pd-Cu/C                                       |                                     | 1.43    | 219                                       | 300                                                   | N/I           | N/I                                            | <sup>11</sup> |

## References

- 1 R. Hao, J. Chen, Z. Wang, Y. Huang, P. Liu, J. Yan, K. Liu, C. Liu and Z. Lu, *J. Colloid Interface Sci.*, 2021, 586, 621–629.
- 2 M. Zhang, X. M. Hu, Y. Xin, L. Wang, Z. Zhou, L. Yang, J. Jiang and D. Zhang, *Sep. Purif. Technol.*, 2023, 308, 122974.
- 3 C. Lin, X. Li, S. S. Shinde, D. H. Kim, X. Song, H. Zhang and J. H. Lee, *ACS Appl. Energy Mater.*, 2019, 2, 1747–1755.
- 4 H. Chen, L. Bao, C. Ou, H. Wang, Y. Liao, R. Li and H. Liu, *Energy Fuels*, 2022, 36, 7699–7709.
- 5 C. Chen, H. Su, L. N. Lu, Y. S. Hong, Y. Chen, K. Xiao, T. Ouyang, Y. Qin and Z. Q. Liu, *J. Chem. Eng.*, 2021, 408, 127814.
- 6 C. Deng, J. Tan, C. Y. Toe, X. Li, G. Li, X. Jiang, S. Wei, H. Yang, Q. Hu and C. He, *J. Mater. Chem. A: Mater.*, 2022, 10, 17217–17224.
- 7 L. Xu, Y. Tian, D. Deng, H. Li, D. Zhang, J. Qian, S. Wang, J. Zhang, H. Li and S. Sun, *ACS Appl. Mater. Interfaces.*, 2020, 12, 31340–31350.
- 8 T. H. Chiang, S. C. Sun and Y. S. Chen, *J. Taiwan Inst. Chem. Eng.*, 2020, 115, 175–186.
- 9 Q. Qin, P. Li, L. Chen and X. Liu, *ACS Appl. Mater. Interfaces.*, 2018, 10, 39828–39838.

- 10 B. Wang, L. Xu, G. Liu, Y. Ye, Y. Quan, C. Wang, W. Wei, W. Zhu, C. Xu, H. Li and J. Xia, *J. Alloys Compd.*, 2020, 826, 154152.
- 11 M. Ma, W. Zhu, Q. Shao, H.
- 12 Shi, F. Liao, C. Shao and M. Shao, *ACS Appl. Nano Mater.*, 2021, 4, 1478–1484.
